# Supplementary material for: Disrupting cellular memory to overcome drug resistance
Source: PubMed Central journal article supplement (PMC10628298; doi:10.1038/s41467-023-41811-8), 2023-11-06
Supplement: 41467_2023_41811_MOESM4_ESM.pdf [file 41467_2023_41811_MOESM4_ESM.pdf]

## **Description of additional supplementary files:**

**Supplementary Data 1: Intermediate state gene sets.** Differential expression analysis comparing drug-susceptible cells in lineages that contain cells that switched state to cells in lineages containing only drug-susceptible cells. We found 575 genes differentially expressed between these types of lineages (based upon a differential gene expression analysis with a cutoff of 0.05 Bonferroni adjusted p-value and 0.25 log fold change cutoff). Differential expression analysis using Wilcoxon rank sum test, two-sided.

**Supplementary Data 2: Differential expression comparing primed and drug susceptible state cells.** Table of differentially expressed genes between primed and drug-susceptible state cells. Differential expression analysis using Wilcoxon rank sum test, two-sided.

**Supplementary Data 3: Differential expression comparing cells that switched states in the presence of PI3Ki to cells that did not switch state.** Table of differentially expressed genes. Differential expression analysis using Wilcoxon rank sum test, two-sided.

**Supplementary Table 1: Primers used to amplify lineage barcodes.** Table of primer sequences used for this study.

**Supplementary Methods 1: Full description of mathematical modeling methods.**
